1 **Captivity and exposure to the emerging fungal**  
2 **pathogen *Batrachochytrium salamandrivorans* are linked to perturbation**  
3 **and dysbiosis of the amphibian skin microbiome**

4

5 Kieran A. Bates<sup>1,2\*</sup>, Jennifer M.G. Shelton<sup>1†</sup>, Victoria L. Mercier<sup>1†</sup>, Kevin P.  
6 Hopkins<sup>2</sup>, Xavier A. Harrison<sup>2</sup>, Silviu O. Petrovan<sup>3,4</sup>, Matthew C. Fisher<sup>1\*</sup>

7

8 †Authors contributed equally

9

10 1. Department of Infectious Disease Epidemiology and MRC Centre for  
11 Global Infectious Disease Analysis, School of Public Health, Imperial  
12 College London, London W2 1PG, UK

13 2. Institute of Zoology, Zoological Society of London, Regent's Park,  
14 London, NW1 4RY, UK

15 3. Department of Zoology, University of Cambridge, Cambridge, CB2  
16 3QZ, UK

17 4. Froglife, Peterborough, PE4 5BW, UK

18

19 \*Correspondence to:

20 Kieran A. Bates, Email: [k.bates14@imperial.ac.uk](mailto:k.bates14@imperial.ac.uk)

21 Matthew C. Fisher, Email: [matthew.fisher@imperial.ac.uk](mailto:matthew.fisher@imperial.ac.uk)

22

23 **Keywords:**

24 *Batrachochytrium salamandrivorans*, disease ecology, emerging fungal

25 pathogens

## 26 **Abstract**

- 27 1. The emerging fungal pathogen, *Batrachochytrium*  
28 *salamandrivorans* (*Bsal*) is responsible for the catastrophic decline of  
29 European salamanders and poses a threat to amphibians globally.
- 30 2. The amphibian skin microbiome is strongly associated with disease  
31 outcome for several host-pathogen systems, yet its role  
32 in *Bsal* infection remains unresolved. In addition, many *in-*  
33 *vivo* *Bsal* studies to date have relied on specimens that have been kept  
34 in captivity for long periods without considering the influence of  
35 environment on the microbiome and how this may impact the host  
36 response to pathogen exposure.
- 37 3. We characterised the impact of captivity and exposure to *Bsal* on the  
38 skin bacterial and fungal communities of two co-occurring European  
39 newt species, the smooth newt (*Lissotriton vulgaris*) and the great-  
40 crested newt (*Triturus cristatus*).
- 41 4. *Bsal* infection and subsequent mortality in both newt species was  
42 associated with perturbation of the skin microbiome and possible  
43 dysbiosis. In addition, reduced microbial diversity and changes in  
44 microbiome structure accompanied the transition of newts from the wild  
45 to captivity, suggesting a possible decline in microbe-associated  
46 protection and increased risk of infection by opportunistic pathogens.
- 47 5. Our findings advance current understanding of the role of host-  
48 associated microbiota in *Bsal* infection and highlight important  
49 considerations for *ex-situ* amphibian conservation programmes.

## 50 **Introduction**

51 Microbial communities associated with amphibian skin are increasingly  
52 recognised for their ecological complexity and importance in pathogen  
53 defence. In particular, studies have demonstrated that skin-associated  
54 bacteria are linked to disease outcome in amphibians infected by the chytrid  
55 fungus *Batrachochytrium dendrobatidis* (*Bd*) (Lauer *et al.* 2007; Harris *et al.*  
56 2009; Jani & Briggs 2014; Kueneman *et al.* 2016; Bates *et al.* 2018).  
57 Specifically, host-associated microbes may offer protection through  
58 production of pathogen-inhibiting compounds (Brucker *et al.* 2008; Woodhams  
59 *et al.* 2017), preventing pathogen colonisation (Buffie & Pamer 2013) or by  
60 outcompeting harmful microbial invaders (Kamada *et al.* 2012). In addition to  
61 the host benefits conferred by the microbiome, some microbes can promote  
62 pathogen growth (Stacy *et al.* 2016), while perturbations of host-associated  
63 microbial communities can negatively impact host health in a process called  
64 dysbiosis (Croswell *et al.* 2009). In recent years, the recognition of the  
65 microbiomes' role in disease has led to a search for pathogen-inhibiting  
66 probiotics and microbial manipulations that could mitigate host infection and  
67 subsequently be utilised as a tool in wildlife conservation (Bletz *et al.* 2013;  
68 Kueneman *et al.* 2016).

69

70 In 2013 a novel pathogenic chytrid fungus, *Batrachochytrium*  
71 *salamandrivorans* (*Bsal*), was discovered that has caused mass mortalities of  
72 caudates in Europe (Martel *et al.* 2013) and threatens amphibians worldwide  
73 (Yap *et al.* 2015). While *Bd* and *Bsal* are closely related phylogenetically and  
74 occupy similar niches as the only known species within the Chytridiomycota

75 capable of infecting vertebrates (Berger *et al.* 1998; Martel *et al.* 2013), they  
76 show marked differences in their biology. *Bd* infects over 500 amphibian  
77 species (Fisher, Garner & Walker 2009) that span all amphibian orders,  
78 whereas *Bsal* has a narrower host range limited mostly to caudates (Martel *et*  
79 *al.* 2014). *Bd* and *Bsal* also differ in their pathogenesis with *Bd* causing  
80 hyperkeratosis and hyperplasia of the amphibian epidermis, compared to  
81 lesions and focal necrosis in *Bsal* (Martel *et al.* 2013). Prior studies have  
82 shown variability in *Bsal* susceptibility between caudate species (Martel *et al.*  
83 2014), however little is known of the determinants of disease outcome. Given  
84 its importance in *Bd* infection, the amphibian skin microbiome is a candidate  
85 driver of within- and between-species variability in response to *Bsal* exposure.  
86 While a great deal is known regarding the impact of *Bd* on the host  
87 microbiome, no *in-vivo* studies have investigated the microbiome response to  
88 *Bsal*. Importantly, it is not possible to predict the impact of *Bsal* on amphibian  
89 microbiota based on prior *Bd* studies, or to presume a microbiome response  
90 similar to that of *Bd*. This is due to a range of factors including intrinsic  
91 biological differences between *Bd* and *Bsal* (Farrer *et al.* 2017), and the  
92 variable responses that single bacterial strains can have with different  
93 pathogen isolates. For example, it is well established that the same bacterial  
94 strain can be either inhibitory or growth-promoting depending on what  
95 genotype of *Bd* it is in co-culture with (Antwis *et al.* 2015; Antwis & Harrison  
96 2018). In addition, more recent studies have shown that certain bacteria  
97 isolated from amphibian skin inhibit *Bsal*, but not always *Bd*, *in-vitro* (Muletz-  
98 Wolz *et al.* 2017) and that *Bd* and *Bsal* metabolites can modulate growth of  
99 different bacteria (Woodhams *et al.* 2017). Taken together, these findings

100 show that differences exist in the way *Bsal* and *Bd* interact with the  
101 microbiome of amphibians, reinforcing the importance of investigating the *in-*  
102 *vivo* host response to *Bsal* exposure.

103

104 A key component of wildlife disease mitigation for highly threatened species is  
105 the establishment of assurance populations or disease treatment in captivity  
106 (Mendelson *et al.* 2006; Gascon 2007). However, despite recognition of the  
107 importance of the microbiome in host health and pathogen defence, few  
108 studies have investigated the potential impact of captivity on the amphibian  
109 skin microbiome (Becker *et al.* 2014; Loudon *et al.* 2014; Bataille *et al.* 2016;  
110 Kueneman *et al.* 2016; Sabino-Pinto *et al.* 2016) and none have investigated  
111 this with respect to *Bsal* mitigation. Prior studies have yielded mixed results  
112 with reductions in bacterial alpha diversity and depletion of chytrid-inhibiting  
113 bacteria in captive compared to wild individuals for some host species  
114 (Loudon *et al.* 2014; Bataille *et al.* 2016; Kueneman *et al.* 2016; Sabino-Pinto  
115 *et al.* 2016) while increased alpha diversity was seen in other species (Becker  
116 *et al.* 2014). In addition, studies investigating the impact of captivity on the  
117 amphibian skin microbiome have neglected to examine microbial kingdoms  
118 other than bacteria, despite recent advances demonstrating that fungi may be  
119 equally important to host health and disease resistance (Kearns *et al.* 2017).  
120 Further, cross-kingdom responses to captivity may not be uniform making it  
121 essential that a more holistic outlook of the skin microbiome is taken.  
122 Understanding the effect of captivity on the host microbiome is especially  
123 important with regard to *Bsal* exposure since field based interventions are  
124 unlikely to be successful owing to disease transmission occurring at low

125 population density (Schmidt *et al.* 2017) and with the only currently effective  
126 treatments being captivity based (Bloom *et al.* 2015a; Bloom *et al.* 2015b).  
127 Gaining insights into how both *Bsal* exposure and the transition from the wild  
128 to captivity affect the caudate skin microbiome is therefore an important  
129 advancement in our understanding of infection as well as being valuable in  
130 informing future captivity-based conservation interventions.

131

132 In this study, we combine field and laboratory studies to investigate how the  
133 amphibian skin microbiome changes with the transition from the wild to  
134 captivity followed by subsequent exposure to *Bsal*. We focus on two UK  
135 caudate species, the smooth newt (*Lissotriton vulgaris*) and the great crested  
136 newt (*Triturus cristatus*). While *L. vulgaris* is ubiquitous in the UK, *T. cristatus*  
137 is rarer, more localised and declining in many parts of its natural range  
138 (Edgar, Griffiths & Foster 2005). *T. cristatus* is also listed as a protected  
139 species in Annexes II and IV of the European Commission Habitats Directive  
140 and under the UK Wildlife and Countryside Act 1981. Consequently, the long-  
141 term population viability of *T. cristatus* is particularly vulnerable to local  
142 disease outbreaks. The susceptibility of captive-raised *T. cristatus* to *Bsal* has  
143 been tested in a prior study (Martel *et al.* 2014) which showed mortality in all  
144 infected animals. Meanwhile, no study to date has investigated the lethality of  
145 *Bsal* in *L. vulgaris*. Testing the effect of *Bsal* on endemic UK species and the  
146 possible risk it poses to wild populations is vital given the recent emergence of  
147 *Bsal* in private collections (Cunningham *et al.* 2015) and the continued spread  
148 of pathogenic chytrids through the global trade (O'Hanlon *et al.* 2018)  
149 suggesting a wild outbreak is possible. Understanding the effects of *Bsal*

150 exposure and the influence of captivity on the amphibian skin microbiome  
151 could therefore not only improve the capacity for developing adequate  
152 national response protocols to disease outbreaks, but also inform effective  
153 captivity based measures that seek to maximise natural pathogen protection.

154

## 155 **Methods**

### 156 ***Field sampling and captivity experiment***

157 A total of 15 adult *Triturus cristatus* and 15 adult *Lissotriton vulgaris* were  
158 collected from a reserve in Cambridgeshire, UK. Individual newts were  
159 generally found under rocks at night and represented less than 0.1% of the  
160 total estimated site population. Using a single sterile MW100 rayon tipped dry  
161 swab (MWE Medical Wire, Corsham, UK), the skin microbiome was sampled  
162 by swabbing the ventral and dorsal surfaces 10 times, and the fore- and  
163 hindlimbs five times. Swabs were stored at -80°C until processed. Animals  
164 were transferred to individual 1.6L plastic boxes containing moss collected  
165 from the field site and transported to the Central Biomedical Services (CBS)  
166 Unit at Imperial College London. In captivity animals were housed individually  
167 under semi-natural conditions in plastic boxes containing a damp paper towel  
168 substrate and a cover object. Enclosures were cleaned with Rely+On Virkon  
169 (Antect International Ltd., Suffolk, UK) and animals were fed mealworms  
170 (*Tenebrio molitor*) or crickets (*Acheta domesticus*) *ad libitum* twice weekly.  
171 The animal room was kept on a 12 hour light/dark cycle and was maintained  
172 at 16°C. At two weeks post capture animals were swabbed again to measure  
173 the effects of captivity on the skin bacterial and fungal community.

174

175 ***Bsal* exposure experiment**

176 In order to compare species response to *Bsal*, experiments were designed to  
177 be as similar as possible to those described in a previous study (Martel *et al.*  
178 2014). *Batrachochytrium salamandrivorans* (isolated from a *Salamandra*  
179 *salamandra* outbreak in the Netherlands, isolate AMFP13/1) was grown in  
180 25cm<sup>3</sup> Nunc tissue culture flasks (Thermo Fisher Scientific, Massachusetts,  
181 USA) containing mTGhL liquid media (8g tryptone, 2g gelatin hydrosylate, 4g  
182 lactose, 950ml distilled water) and incubated at 15°C. Ten individuals from  
183 each caudate species were randomly assigned to a treatment group and  
184 exposed to 500uL of mTGhL media containing 50 x 10<sup>4</sup> *Bsal* zoospores. The  
185 remaining five individuals from each species were assigned to a control group  
186 and exposed to 500uL of mTGhL liquid media. The inoculum was pipetted  
187 directly onto the dorsum of the animal. During exposure, *T. cristatus* were  
188 placed individually in 0.7L plastic boxes and *L. vulgaris* were placed in sterile  
189 petri dishes for 22 hours.

190

191 Animals were weighed and swabbed prior to *Bsal* infection on day 0 of the  
192 experiment and then every 7 days post infection for a period of 58 days. On  
193 day 58 of the experiment surviving animals were euthanized by an overdose  
194 of tricaine methanesulfonate (MS222) and subsequent destruction of the brain  
195 following UK Home Office animal procedure guidelines. In agreement with  
196 ethical protocols, any animals exhibiting pre-defined endpoint criteria (lack of  
197 righting reflex within five seconds of being inverted, persistent skin lesions  
198 covering over 20% of the body or that became septic, greater than 20% loss  
199 in body weight) were euthanized prior to day 58.



200 **Sample processing, DNA extraction and quantification of *Bsal* infection**

201 Genomic DNA was extracted from swabs using a bead beating protocol  
202 (Boyle *et al.* 2004) and diluted 1/10 before undergoing subsequent PCR  
203 based analyses. Quantification of *Bsal* infection load was done using qPCR  
204 amplification following a modified published method (Boyle *et al.* 2004) that  
205 included a *Bsal* specific probe (STerCVIC), forward primer (STerFC) and  
206 reverse primer (STerT). Each sample was run in duplicate and with *Bsal*  
207 standards of 100, 10 and 1 genomic equivalents (GE). A distilled water  
208 negative control was also included. Samples were considered positive if both  
209 wells gave a GE of greater than 0.1.

210

211 **Bacterial microbiome sample processing**

212 DNA extracted from swabs was used to amplify the V4 region of the 16S  
213 rRNA gene using custom barcoded primers and PCR conditions adapted from  
214 a prior study (Kozich *et al.* 2013). PCR conditions consisted of a denaturing  
215 step of 95°C for 15 min, followed by 28 cycles of 95°C for 20s, 50°C for 60s,  
216 72°C for 60s and a final extension step of 72°C for 10 min. Each PCR  
217 including a negative water control was performed in triplicate. Amplicons were  
218 visualized on a 2% agarose gel and pooled yielding a final per sample volume  
219 of 24µl. Pooled amplicon DNA was purified using an Ampure XP PCR  
220 purification kit (Beckman Coulter, California, USA). Following purification, 1ul  
221 of each combined sample was pooled into a preliminary library and the  
222 concentration was determined using Qubit fluorometric quantification (Life  
223 Technologies, California, USA). Amplicon quality and incidence of primer  
224 dimer was assessed using an Agilent 2200 TapeStation system (Agilent

225 Technologies, California, USA). A titration run of 300 sequencing cycles was  
226 performed on a MiSeq instrument (Illumina, California, USA) to quantify the  
227 number of reads yielded per sample from the preliminary library. An equimolar  
228 concentration of each sample was then pooled into a final composite library  
229 based on the index representation from the titration run and subsequently  
230 sequenced on a 500 cycle MiSeq run with a 250 bp paired-end strategy.

231

### 232 ***Fungal mycobiome sample processing***

233 DNA extracted from swabs was used to amplify the ITS2 region of the fungal  
234 internal transcribed spacer (ITS) using custom barcoded primers (Kozich *et al.*  
235 2013) and the following PCR conditions: denaturing step of 95°C for 2 min,  
236 followed by 35 cycles of 95°C for 20s, 50°C for 20s, 72°C for 5 min and a final  
237 extension step of 72°C for 5 min. Each PCR plate included a negative swab  
238 control and negative water control, and was performed in duplicate.

239 Amplicons were visualized on a 1.5% agarose gel and pooled yielding a final  
240 per sample volume of 50µl. Pooled amplicon DNA was purified using AMPure  
241 XP bead clean-up (Beckman Coulter, California, USA). Qubit fluorometric  
242 quantification (Life Technologies, California, USA) was used to determine the  
243 concentration of each purified sample, which were equimolar pooled to create  
244 the final library sample. This pooled sample was run on an Agilent 2200  
245 TapeStation system (Agilent Technologies, California, USA) to assess  
246 amplicon distribution and presence of primer dimer. The sample underwent  
247 300bp paired-end sequencing using v3 chemistry on an Illumina MiSeq  
248 platform.

249

250 ***Bacterial microbiome analysis***

251 Sequences were processed using MOTHUR (Schloss *et al.* 2009) following a  
252 previously described method (Kozich *et al.* 2013). Paired-end reads were split  
253 by sample and assembled into contigs. Sequences were quality filtered by  
254 removing ambiguous base calls, removing homopolymer regions longer than  
255 8 bp, and trimming reads longer than 275 bp. Duplicate sequences were  
256 merged and aligned with 16S reference sequences from the SILVA small-  
257 subunit rRNA sequence database (Pruesse *et al.* 2007). A pre-clustering step  
258 grouped sequences differing by a maximum of 2 bp. Chimeric sequences  
259 were removed using UCHIME (Edgar *et al.* 2011) as implemented in  
260 MOTHUR. 16S rRNA gene sequences were clustered into groups according  
261 to their taxonomy at the level of order and assigned operational taxonomic  
262 units (OTUs) at a 3% dissimilarity level. Sequences were taxonomically  
263 classified with an 80% bootstrap confidence threshold using a naïve Bayesian  
264 classifier with a training set (version 9) made available through the Ribosomal  
265 Database Project (<http://rdp.cme.msu.edu>) (Wang *et al.* 2007). Sequences  
266 derived from chloroplasts, mitochondria, archaea, eukaryotes or unknown  
267 reads were eliminated. The number of sequences per sample ranged from  
268 17804 to 63367. To mitigate the effects of uneven sampling (Schloss, Gevers  
269 & Westcott 2011) all samples were rarefied to 17804 sequences  
270 corresponding to the size of the lowest read sample. OTUs making up less  
271 than 0.01% of the total reads were removed (Bokulich *et al.* 2013).  
272 Downstream analysis of OTUs was carried out using the package Phyloseq  
273 (McMurdie & Holmes 2013) in R version 3.4.1 (R Development Core Team  
274 2017).

## 275 ***Fungal mycobiome analysis***

276 Analysis of fungal communities was performed for the wild versus captive  
277 experiment only. Following sequencing, forward and reverse reads were  
278 assigned to samples according to dual index combinations and were paired  
279 using Paired-End reAd mergeR (PEAR) (Zhang *et al.* 2014). Paired-end reads  
280 were trimmed by per-base quality score using MOTHUR (Schloss *et al.* 2009)  
281 and reads shorter than 50bp or containing ambiguous base calls were  
282 removed. UCHIME (Edgar *et al.* 2011) was used to identify and remove  
283 chimeric sequences, and remaining sequences were clustered into  
284 Operational Taxonomic Units (OTUs) based on 97% similarity using Cd-hit (Li  
285 & Godzik 2006). The most abundant sequence in each OTU was used for  
286 BLASTn searches against the User-friendly Nordic ITS Ectomycorrhiza  
287 (UNITE) database (Koljalg *et al.* 2005). Unidentified sequences or those  
288 belonging to kingdoms other than “fungi” were removed, as were fungal  
289 sequences with BLASTn search result e-values  $>e^{-20}$  or identity  $<85\%$ . The  
290 number of sequences per sample ranged from 3252 to 39493. Downstream  
291 analysis of OTUs was carried out using the package Phyloseq (McMurdie &  
292 Holmes 2013) in R version 3.4.1.

293

## 294 ***Statistical analysis***

295 To determine the effect of captivity and *Bsal* exposure on the microbiome, we  
296 calculated both alpha and beta diversity metrics using the phyloseq package  
297 (McMurdie & Holmes 2013) in R version 3.4.1 (R Development Core Team  
298 2017). Shannon diversity was calculated for all samples and a mixed linear  
299 model (package lme4 (Bates *et al.* 2015)) was used to investigate changes in

300 diversity in captive versus wild animals whilst taking into account repeated  
301 sampling. For the exposure experiment, separate mixed linear models were  
302 used for each newt species to investigate the effect of day of sampling,  
303 experimental group, mass, *Bsal* infection intensity and survival on Shannon  
304 diversity. P-values were calculated using the Kenward-Roger approximation  
305 of degrees of freedom in the afex package (Singmann *et al.* 2017). A Bray-  
306 Curtis distance matrix was used to calculate beta diversity for both the  
307 captivity study and *Bsal* challenge experiment. Beta diversity for both the  
308 captivity study and *Bsal* challenge experiment was visualised using Detrended  
309 Correspondence Analysis (DCA) plots. For the captivity study, the effects of  
310 captivity, host species and their interaction on skin microbial community  
311 structure was assessed using permutational multivariate analysis of variance  
312 (PERMANOVA) (Anderson 2001) using the adonis function in the vegan  
313 package (Oksanen *et al.* 2016). For the *Bsal* challenge experiment differences  
314 in beta diversity based on treatment, *Bsal* infection status and survival were  
315 investigated using PERMANOVA. Differentially abundant bacterial OTUs in  
316 both wild and captive individuals of each species and for each outcome group  
317 at day 28 of the infection experiment were determined using indicator analysis  
318 (Dufrene & Legendre 1997) using the labdsv package (Roberts 2016). An  
319 indicator score of  $\geq 0.7$  and  $q$ -value  $< 0.05$  was used as a cut-off (Becker *et al.*  
320 2015; Longo & Zamudio 2017). Differences in survival among animals in the  
321 *Bsal* exposure experiment was investigated using a cox proportional-hazard  
322 regression model in the survival package (Therneau 2015) with mass at the  
323 beginning of the experiment, species, and GE at time of death or at the end of  
324 the experiment included as covariates.

## 325 Results

326 Our analysis found rapid reductions in bacterial and fungal Shannon diversity  
327 associated with the transition from the wild to captivity for both host species  
328 ( $p < 0.0001$ , Fig. 1a, b). Bacterial and fungal beta diversity differed in wild  
329 versus captive conditions (PERMANOVA, bacteria wild-captive: Pseudo-  
330  $F_{(1,56)} = 66.84$ ,  $R^2 = 0.505$ ,  $p = 0.001$ , fungal wild-captive: Pseudo- $F_{(1,28)} = 8.48$ ,  
331  $R^2 = 0.217$ ,  $p = 0.001$ ) and a host species effect was present for bacterial  
332 communities (PERMANOVA, host species: Pseudo- $F_{(1,56)} = 5.46$ ,  $R^2 = 0.041$ ,  
333  $p = 0.007$ , host species\*wild-captive: Pseudo- $F_{(1,56)} = 4.02$ ,  $R^2 = 0.030$ ,  $p = 0.016$ ,  
334 Fig. 1c-d). Interestingly, changes in alpha and beta diversity associated with  
335 captivity were mirrored for bacteria and fungi demonstrating a common  
336 response across microbial kingdoms. Captivity was associated with  
337 compositional changes in the core microbiome of both species with reductions  
338 in taxa such as *Cladosporium* and *Pseudomonas* (Fig. 1.e,f). Indicator  
339 analysis of wild versus captive specimens identified 178 and 167 differentially  
340 abundant bacterial OTUs in *T. cristatus* and *L. vulgaris* respectively (Fig. 2a,b;  
341 SI Table 1,2). Significant differences in fungal OTU abundance associated  
342 with captivity were also evident with 45 indicator OTUs for *T. cristatus* and 18  
343 indicator OTUs for *L. vulgaris* (SI Table 3,4). Interestingly both host species  
344 demonstrated similar indicator OTU profiles of major bacterial groups (Fig.  
345 2a,b) with changes in abundance of potentially important taxa such the  
346 Actinomycetales that are a major source of antimicrobial compounds (Berdy  
347 2005) and *Lysobacter* (SI Table 1,2) that was previously identified as  
348 inhibitory against the closely related *Batrachochytrium dendrobatidis* (Brucker  
349 *et al.* 2008). In addition to the reduction in putatively protective microbes, in

350 captive *T. cristatus* there was an increase in pathogenic fungi such as  
351 *Basidiobolus ranarum* (SI Table 3) which has previously been shown to cause  
352 disease in amphibians (Taylor *et al.* 1999).

353

354 *Bsal* exposure resulted in infection in 40% of *L. vulgaris* and 60% of *T.*  
355 *cristatus*. Prevalence and infection intensity fluctuated throughout the  
356 experiment for both species (SI Table 5, Fig. 3) with *T. cristatus* exhibiting  
357 consistently higher infection intensity and prevalence than *L. vulgaris*.  
358 Lesions were evident in 50% of *T. cristatus* and 75% of *L. vulgaris* that tested  
359 *Bsal* positive (SI Table 5, SI Fig. 1). Of the animals that tested positive for  
360 *Bsal*, 50% of *T. cristatus* died, while 25% of *L. vulgaris* died over the 58 days  
361 of the experiment. Of the four *L. vulgaris* that became infected with *Bsal*, three  
362 animals cleared infection, while for *T. cristatus* only one of six *Bsal* positive  
363 animals cleared infection. Survival analysis showed that infection intensity but  
364 not species or mass were significantly associated with mortality (hazard-  
365 ratio=1.07,  $p=0.022$ , SI Table 6).

366

367 Bacterial Shannon diversity differed based on day of sampling and mass for  
368 *T. cristatus* (day:  $F_{(2,29.2)}=15.75$ ,  $p=0.0001$ , mass:  $F_{(1,13.7)}=4.68$ ,  $p=0.05$ ), but  
369 did not significantly alter over the course of the experiment in *L. vulgaris* (day:  
370  $p=0.16$ , mass:  $p=0.96$ ). Beta diversity differed only on day 28 based on  
371 treatment for *T. cristatus* (PERMANOVA Pseudo- $F_{(1,11)}=2.34$ ,  $R^2=0.108$ ,  
372  $p=0.045$ ) and for both host species based on disease status (PERMANOVA  
373 *T. cristatus* Pseudo- $F_{(1,11)}=4.48$ ,  $R^2=0.199$ ,  $p=0.002$ , *L. vulgaris* Pseudo-  
374  $F_{(1,11)}=4.95$ ,  $R^2=0.247$ ,  $p=0.001$ , Fig. 4a, b) and survival (PERMANOVA *T.*

375 *cristatus* Pseudo- $F_{(1,11)}=4.59$ ,  $R^2=0.204$ ,  $p=0.006$ , *L. vulgaris* Pseudo-  
376  $F_{(1,11)}=2.44$ ,  $R^2=0.122$ ,  $p=0.048$ ). In *L. vulgaris*, on day 28 two individuals  
377 demonstrated microbiome perturbation, but cleared infection and returned to a  
378 microbiome state that did not differ significantly from control animals by day  
379 56 (Fig. 4a). Indicator analysis of microbiome samples based on control, *Bsal*  
380 negative and *Bsal* positive animals from day 28 identified ten and six  
381 differentially abundant bacterial operational taxonomic units (OTUs) in *L.*  
382 *vulgaris* and *T. cristatus* respectively (Fig. 4c,d, SI Table 7). Both *L. vulgaris*  
383 and *T. cristatus* exhibited different indicator taxa profiles with the exception of  
384 *Stenotrophomonas* (Fig. 4e,f), which was strongly associated with *Bsal*  
385 infection in both species.

386

## 387 **Discussion**

388 We demonstrate that both captivity and exposure to *Bsal* impact the  
389 amphibian skin microbiome. The decrease in microbial Shannon diversity and  
390 changes in beta diversity associated with captivity supports findings of  
391 previous studies (Becker *et al.* 2014; Kueneman *et al.* 2016) and is likely  
392 correlated with a reduction in environmental microbes and changes to the  
393 host environment (Harrison *et al.* 2017). Importantly, both fungi and bacteria  
394 exhibited similar changes in alpha and beta diversity suggesting that  
395 commonalities exist in response to selection pressures across both microbial  
396 kingdoms. The perturbation in microbial diversity that occurs due to the  
397 transition from the wild to captivity may also change the ecological dynamics  
398 and functional capacity of the skin by altering host-microbe interactions in  
399 such a way that biases host- or microbe-mediated control of the microbiome



400 (Foster *et al.* 2017). Specifically, the divergence in microbiome structure of  
401 different host species in captivity may be indicative of stronger host-mediated  
402 control, with host species differing in their selection of microbes in a common  
403 captive environment. This in turn may lead to decline of some potentially  
404 pathogenic taxa as signified by the reduction in OTUs belonging to the  
405 Chlamydiales (Fig. 2a,b) which have previously been associated with  
406 amphibian epizootics (Reed *et al.* 2000). Conversely, the reduced microbial  
407 diversity associated with captivity in both host species may also be a  
408 consequence of greater microbe-mediated control with diminished ecological  
409 resistance of the host skin microbiome rendering it more susceptible to  
410 potentially harmful invaders that may subsequently dominate the microbial  
411 community (Piovia-Scott *et al.* 2017). This hypothesis is supported by a  
412 reduction of putatively beneficial bacterial groups in captivity such as the  
413 Actinomycetales (Fig. 2a,b) which are well known for producing antimicrobial  
414 compounds (Berdy 2005). In addition, taxa belonging to the genus *Lysobacter*  
415 that have previously been associated with inhibition of other pathogenic  
416 chytrids (Brucker *et al.* 2008; Bates *et al.* 2018) showed a reduction in  
417 abundance in captivity. Captivity was also associated with an increase in  
418 abundance of the amphibian fungal pathogen *Basidiobolus ranarum* for both  
419 host species (though only significant in *T. cristatus*) further suggesting captive  
420 conditions may favour host-pathogen interactions as protective aspects of  
421 microbial diversity are lost. While the overall reduction in microbial diversity  
422 associated with captivity may impact host resistance to disease, the additional  
423 perturbation of microbial community structure may lead to dysbiotic effects  
424 (Zaneveld, McMinds & Thurber 2017). These findings suggest that captivity

425 induced changes in the microbiome may reduce host capability to evade  
426 pathogens and potentially predispose such individuals towards adverse health  
427 outcomes. Importantly, this is the first study of its kind to measure the effect of  
428 captivity on fungal communities, which despite being overlooked relative to  
429 bacteria, have been shown in some cases to confer higher rates of chytrid  
430 inhibition (Kearns *et al.* 2017). In light of the major perturbation of fungal  
431 communities, it is imperative that future studies utilise a more holistic view of  
432 the microbiome to include kingdoms other than bacteria. Overall, our results  
433 highlight that host microbial ecology should carefully be considered when  
434 transferring animals from the wild to captivity to reduce possible microbiome  
435 disturbance, prevent proliferation of opportunistic pathogens and preserve  
436 microbes that are beneficial to host health. For *ex-situ* conservation  
437 programmes that aim to rescue or re-establish wild amphibian populations  
438 using captive-bred stock, the implications are complex and suggest that  
439 maintenance or 'rewilding' of the skin microbiome would be an essential  
440 aspect before reintroduction.

441

442 Exposure to *Bsal* resulted in mortality in both *L. vulgaris* and *T. cristatus*.  
443 While mortality was higher in *T. cristatus*, this was not statistically significant  
444 when compared to *L. vulgaris*. The intensity of infection was found to be  
445 higher in *T. cristatus*, which had a maximum GE of 338 compared to a  
446 maximum GE of 195 for *L. vulgaris*. These data, while preliminary, suggest  
447 that *T. cristatus* may be more susceptible to *Bsal* infection than *L. vulgaris*.  
448 Further, the greater zoospore burdens that *T. cristatus* harbour, coupled with  
449 their larger size and rates of zoospore shedding, suggest that they will be

450 more important drivers of outbreak dynamics than *L. vulgaris*. Interestingly,  
451 our findings counter those of a previous study that found 100% mortality in *T.*  
452 *cristatus* and a species effect on survival (Martel *et al.* 2014). The increased  
453 survival of *T. cristatus* here compared to the prior study (Martel *et al.* 2014)  
454 may be explained by a range of factors. In particular, the studies used  
455 animals collected from different countries (the UK versus the Netherlands)  
456 and there will likely be differences in host genetics and immunity. In addition,  
457 the initial microbiome of the animals will almost certainly differ which may  
458 have an impact on the subsequent host microbial response to infection.  
459 These findings highlight the importance of investigating a geographically  
460 diverse range of hosts from the same species when conducting species level  
461 risks assessments of emerging pathogens. While this additional confirmation  
462 of *Bsal* induced death in *T. cristatus* warrants serious concern, the higher  
463 survivorship shown here may suggest a more optimistic outlook in the event  
464 of a wild *Bsal* outbreak for this species than previously predicted.  
465  
466 Bacterial community structure of individuals in the experiment differed  
467 significantly for both species based on infection status and survival. These  
468 findings are consistent with results of prior studies on *Bd* (Jani & Briggs 2014),  
469 suggesting that infection by *Bsal* and *Bd* are both associated with microbiome  
470 disruption. Two *L. vulgaris* individuals tested positive for *Bsal* and  
471 demonstrated significant microbiome perturbation that may be indicative of  
472 dysbiosis on day 28 of the experiment, but subsequently cleared infection by  
473 day 56. In both cases *Bsal* clearance was associated with a change in  
474 microbiome profile that was similar to that of control animals. Determining

475 what underpins this recovery in *L. vulgaris*, whether driven by host factors  
476 such as secretion of antimicrobial peptides or *Bsal* inhibition by microbes, will  
477 be vital in determining the key parameters underpinning infection outcome.  
478 Indicator analysis revealed that the bacterial taxa associated with disease  
479 state were different based on host species with the exception of one OTU  
480 classified as *Stenotrophomonas*. Interestingly, a prior study demonstrated  
481 *Stenotrophomonas* as inhibitory to *Bsal* and several *Bd* genotypes (Muletz-  
482 Wolz *et al.* 2017). Meanwhile, another study identified an isolate of  
483 *Stenotrophomonas* as inhibitory to *Bd in-vitro*, however when applied as a  
484 probiotic on an amphibian host exposed to *Bd in-vivo*, mortality was higher  
485 than animals that were exposed to only *Bd* (Becker *et al.* 2015). Ultimately,  
486 determining whether *Stenotrophomonas* is associated with microbe mediated  
487 defence or synergistic growth with *Bsal* will require further experiments that  
488 take into account microbial function. While both newt species shared few taxa  
489 that were associated with disease outcome, the common perturbation in beta  
490 diversity associated with death in both *L. vulgaris* and *T. cristatus* may  
491 suggest that *Bsal* survival is not linked to specific taxa, but rather perturbation  
492 of a stable host microbiome resulting in an overall negative impact on health  
493 (Zaneveld, McMinds & Thurber 2017). Further support to this hypothesis is  
494 given by the return to a stable microbiome state in animals that cleared  
495 infection.

496

497 Our results build on the work of prior studies by demonstrating significant and  
498 potentially negative effects of captivity on the amphibian skin microbiome. In  
499 addition, we provide vital insight into the disease process of *Bsal* by

500 demonstrating a close link between infection outcome and microbiome  
501 structure. Overall, our findings demonstrate that it is vital for host microbial  
502 ecology to be considered in future *Bsal* studies and captive based  
503 conservation programmes.

504

#### 505 **Data accessibility**

506 Sequence data have been deposited on the BioProject database under  
507 accession code PRJNA430498. All other data are available upon request from  
508 the authors.

509

#### 510 **References**

- 511 Anderson, M.J. (2001) A new method for non-parametric multivariate analysis  
512 of variance. *Austral Ecology*, 26, 32-46.
- 513 Antwis, R.E. & Harrison, X.A. (2018) Probiotic consortia are not uniformly  
514 effective against different amphibian chytrid pathogen isolates.  
515 *Molecular Ecology*, 27, 577-589.
- 516 Antwis, R.E., Preziosi, R.F., Harrison, X.A. & Garner, T.W. (2015) Amphibian  
517 symbiotic bacteria do not show a universal ability to inhibit growth of  
518 the global panzootic lineage of *Batrachochytrium dendrobatidis*.  
519 *Applied and Environmental Microbiology*, 81, 3706-3711.
- 520 Bataille, A., Lee-Cruz, L., Tripathi, B., Kim, H. & Waldman, B. (2016)  
521 Microbiome variation across amphibian skin regions: Implications for  
522 chytridiomycosis mitigation efforts. *Microbial Ecology*, 71, 221-232.
- 523 Bates, D., Machler, M., Bolker, B.M. & Walker, S.C. (2015) Fitting linear  
524 mixed-effects models using lme4. *Journal of Statistical Software*, 67, 1-  
525 48.
- 526 Bates, K.A., Clare, F.C., O'Hanlon, S., Bosch, J., Brookes, L., Hopkins, K., . . .  
527 Harrison, X.A. (2018) Amphibian chytridiomycosis outbreak dynamics  
528 are linked with host skin bacterial community structure. *Nature*  
529 *Communications*, 9, 693.
- 530 Becker, M.H., Richards-Zawacki, C.L., Gratwicke, B. & Belden, L.K. (2014)  
531 The effect of captivity on the cutaneous bacterial community of the  
532 critically endangered panamanian golden frog (*Atelopus zeteki*).  
533 *Biological Conservation*, 176, 199-206.
- 534 Becker, M.H., Walke, J.B., Cikanek, S., Savage, A.E., Mattheus, N., Santiago,  
535 C.N., . . . Gratwicke, B. (2015) Composition of symbiotic bacteria  
536 predicts survival in panamanian golden frogs infected with a lethal  
537 fungus. *Proceedings of the Royal Society B: Biological Sciences*, 282,  
538 20142881.

- 539 Berdy, J. (2005) Bioactive microbial metabolites - a personal view. *Journal of*  
540 *Antibiotics*, 58, 1-26.
- 541 Berger, L., Speare, R., Daszak, P., Green, D.E., Cunningham, A.A., Goggin,  
542 C.L., . . . Parkes, H. (1998) Chytridiomycosis causes amphibian  
543 mortality associated with population declines in the rain forests of  
544 australia and central america. *Proceedings of the National Academy of*  
545 *Sciences of the United States of America*, 95, 9031-9036.
- 546 Bletz, M.C., Loudon, A.H., Becker, M.H., Bell, S.C., Woodhams, D.C.,  
547 Minbiole, K.P.C. & Harris, R.N. (2013) Mitigating amphibian  
548 chytridiomycosis with bioaugmentation: Characteristics of effective  
549 probiotics and strategies for their selection and use. *Ecology Letters*,  
550 16, 807-820.
- 551 Blooi, M., Martel, A., Haesebrouck, F., Vercammen, F., Bonte, D. & Pasmans,  
552 F. (2015a) Treatment of urodela based on temperature dependent  
553 infection dynamics of *Batrachochytrium salamandrivorans*. *Scientific*  
554 *Reports*, 5, 8037.
- 555 Blooi, M., Pasmans, F., Rouffaer, L., Haesebrouck, F., Vercammen, F. &  
556 Martel, A. (2015b) Successful treatment of *Batrachochytrium*  
557 *salamandrivorans* infections in salamanders requires synergy between  
558 voriconazole, polymyxin E and temperature. *Scientific Reports*, 5,  
559 11788.
- 560 Bokulich, N.A., Subramanian, S., Faith, J.J., Gevers, D., Gordon, J.I., Knight,  
561 R., . . . Caporaso, J.G. (2013) Quality-filtering vastly improves diversity  
562 estimates from illumina amplicon sequencing. *Nature Methods*, 10, 57-  
563 U11.
- 564 Boyle, D.G., Boyle, D.B., Olsen, V., Morgan, J.A.T. & Hyatt, A.D. (2004) Rapid  
565 quantitative detection of chytridiomycosis (*Batrachochytrium*  
566 *dendrobatidis*) in amphibian samples using real-time taqman pcr assay.  
567 *Diseases of Aquatic Organisms*, 60, 141-148.
- 568 Brucker, R.M., Baylor, C.M., Walters, R.L., Lauer, A., Harris, R.N. & Minbiole,  
569 K.P. (2008) The identification of 2,4-diacetylphloroglucinol as an  
570 antifungal metabolite produced by cutaneous bacteria of the  
571 salamander *Plethodon cinereus*. *Journal of Chemical Ecology*, 34, 39-  
572 43.
- 573 Buffie, C.G. & Pamer, E.G. (2013) Microbiota-mediated colonization  
574 resistance against intestinal pathogens. *Nature Reviews. Immunology*,  
575 13, 790-801.
- 576 Croswell, A., Amir, E., Tegatz, P., Barman, M. & Salzman, N.H. (2009)  
577 Prolonged impact of antibiotics on intestinal microbial ecology and  
578 susceptibility to enteric *Salmonella* infection. *Infection and Immunity*,  
579 77, 2741-2753.
- 580 Cunningham, A.A., Beckmann, K., Perkins, M., Fitzpatrick, L., Cromie, R.,  
581 Redbond, J., . . . Fisher, M.C. (2015) Emerging disease in UK  
582 amphibians. *The Veterinary Record*, 176, 468.
- 583 Dufrene, M. & Legendre, P. (1997) Species assemblages and indicator  
584 species: The need for a flexible asymmetrical approach. *Ecological*  
585 *Monographs*, 67, 345-366.
- 586 Edgar, P.W., Griffiths, R.A. & Foster, J.P. (2005) Evaluation of translocation  
587 as a tool for mitigating development threats to great crested newts

- 588 (*Triturus cristatus*) in England, 1990–2001. *Biological Conservation*,  
589 122, 45-52.
- 590 Edgar, R.C., Haas, B.J., Clemente, J.C., Quince, C. & Knight, R. (2011)  
591 Uchime improves sensitivity and speed of chimera detection.  
592 *Bioinformatics*, 27, 2194-2200.
- 593 Farrer, R.A., Martel, A., Verbrugge, E., Abouelleil, A., Ducatelle, R.,  
594 Longcore, J.E., . . . Cuomo, C.A. (2017) Genomic innovations linked to  
595 infection strategies across emerging pathogenic chytrid fungi. *Nature*  
596 *Communications*, 8, 14742.
- 597 Fisher, M.C., Garner, T.W. & Walker, S.F. (2009) Global emergence of  
598 *Batrachochytrium dendrobatidis* and amphibian chytridiomycosis in  
599 space, time, and host. *Annual Review of Microbiology*, 63, 291-310.
- 600 Foster, K.R., Schluter, J., Coyte, K.Z. & Rakoff-Nahoum, S. (2017) The  
601 evolution of the host microbiome as an ecosystem on a leash. *Nature*,  
602 548, 43-51.
- 603 Gascon, C., Collins, J.P., Moore, R.D., Church, D.R., McKay, J.E. &  
604 Mendelson, J.R. III (eds) (2007) *Amphibian conservation action plan :  
605 Proceedings IUCN/SSC amphibian conservation summit 2005*. World  
606 Conservation Union (IUCN), Gland, Switzerland.
- 607 Harris, R.N., Brucker, R.M., Walke, J.B., Becker, M.H., Schwantes, C.R.,  
608 Flaherty, D.C., . . . Minbiole, K.P. (2009) Skin microbes on frogs  
609 prevent morbidity and mortality caused by a lethal skin fungus. *The*  
610 *ISME journal*, 3, 818-824.
- 611 Harrison, X.A., Price, S.J., Hopkins, K., Leung, W.T.M., Sergeant, C. &  
612 Garner, T. (2017) Host microbiome richness predicts resistance to  
613 disturbance by pathogenic infection in a vertebrate host. *bioRxiv*.
- 614 Jani, A.J. & Briggs, C.J. (2014) The pathogen *Batrachochytrium dendrobatidis*  
615 disturbs the frog skin microbiome during a natural epidemic and  
616 experimental infection. *Proceedings of the National Academy of*  
617 *Sciences of the United States of America*, 111, E5049-5058.
- 618 Kamada, N., Kim, Y.G., Sham, H.P., Vallance, B.A., Puente, J.L., Martens,  
619 E.C. & Nunez, G. (2012) Regulated virulence controls the ability of a  
620 pathogen to compete with the gut microbiota. *Science*, 336, 1325-  
621 1329.
- 622 Kearns, P.J., Fischer, S., Fernandez-Beaskoetxea, S., Gabor, C.R., Bosch, J.,  
623 Bowen, J.L., . . . Woodhams, D.C. (2017) Fight fungi with fungi:  
624 Antifungal properties of the amphibian mycobiome. *Frontiers in*  
625 *Microbiology*, 8, 2494.
- 626 Koljalg, U., Larsson, K.H., Abarenkov, K., Nilsson, R.H., Alexander, I.J.,  
627 Eberhardt, U., . . . Ursing, B.M. (2005) Unite: A database providing  
628 web-based methods for the molecular identification of ectomycorrhizal  
629 fungi. *New Phytologist*, 166, 1063-1068.
- 630 Kozich, J.J., Westcott, S.L., Baxter, N.T., Highlander, S.K. & Schloss, P.D.  
631 (2013) Development of a dual-index sequencing strategy and curation  
632 pipeline for analyzing amplicon sequence data on the miseq illumina  
633 sequencing platform. *Applied and Environmental Microbiology*, 79,  
634 5112-5120.
- 635 Kueneman, J.G., Woodhams, D.C., Harris, R., Archer, H.M., Knight, R. &  
636 McKenzie, V.J. (2016) Probiotic treatment restores protection against

- 637 lethal fungal infection lost during amphibian captivity. *Proceedings of*  
638 *the Royal Society B: Biological Sciences*, 283, 20161553.
- 639 Lauer, A., Simon, M.A., Banning, J.L., Andre, E., Duncan, K. & Harris, R.N.  
640 (2007) Common cutaneous bacteria from the eastern red-backed  
641 salamander can inhibit pathogenic fungi. *Copeia*, 2007, 630-640.
- 642 Li, W.Z. & Godzik, A. (2006) Cd-hit: A fast program for clustering and  
643 comparing large sets of protein or nucleotide sequences.  
644 *Bioinformatics*, 22, 1658-1659.
- 645 Longo, A.V. & Zamudio, K.R. (2017) Temperature variation, bacterial diversity  
646 and fungal infection dynamics in the amphibian skin. *Molecular*  
647 *Ecology*, 26, 4787-4797.
- 648 Loudon, A.H., Woodhams, D.C., Parfrey, L.W., Archer, H., Knight, R.,  
649 McKenzie, V. & Harris, R.N. (2014) Microbial community dynamics and  
650 effect of environmental microbial reservoirs on red-backed  
651 salamanders (*Plethodon cinereus*). *The ISME journal*, 8, 830-840.
- 652 Martel, A., Blooi, M., Adriaensen, C., Van Rooij, P., Beukema, W., Fisher,  
653 M.C., . . . Pasmans, F. (2014) Recent introduction of a chytrid fungus  
654 endangers western palearctic salamanders. *Science*, 346, 630-631.
- 655 Martel, A., Spitzen-van der Sluijs, A., Blooi, M., Bert, W., Ducatelle, R., Fisher,  
656 M.C., . . . Pasmans, F. (2013) *Batrachochytrium salamandrivorans* sp  
657 nov causes lethal chytridiomycosis in amphibians. *Proceedings of the*  
658 *National Academy of Sciences of the United States of America*, 110,  
659 15325-15329.
- 660 McMurdie, P.J. & Holmes, S. (2013) Phyloseq: An r package for reproducible  
661 interactive analysis and graphics of microbiome census data. *PLoS*  
662 *One*, 8, e61217.
- 663 Mendelson, J.R., Lips, K.R., Gagliardo, R.W., Rabb, G.B., Collins, J.P.,  
664 Diffendorfer, J.E., . . . Brodie, E.D. (2006) Biodiversity - confronting  
665 amphibian declines and extinctions. *Science*, 313, 48-48.
- 666 Muletz-Wolz, C.R., Almario, J.G., Barnett, S.E., DiRenzo, G.V., Martel, A.,  
667 Pasmans, F., . . . Lips, K.R. (2017) Inhibition of fungal pathogens  
668 across genotypes and temperatures by amphibian skin bacteria.  
669 *Frontiers in Microbiology*, 8, 1551.
- 670 O'Hanlon, S.J., Rieux, A., Farrer, R.A., Rosa, G.M., Waldman, B., Bataille, A.,  
671 . . . Fisher, M.C. (2018) Recent asian origin of chytrid fungi causing  
672 global amphibian declines. *Science*, 360, 621-627.
- 673 Oksanen, J., Blanchet, F.G., Kindt, R., Legendre, P., Minchin, P.R., O'Hara,  
674 R.B., . . . Wagner, H. (2016) Vegan: Community ecology package. *R*  
675 *package version 2.3-4*.
- 676 Piovia-Scott, J., Rejmanek, D., Woodhams, D.C., Worth, S.J., Kenny, H.,  
677 McKenzie, V., . . . Foley, J.E. (2017) Greater species richness of  
678 bacterial skin symbionts better suppresses the amphibian fungal  
679 pathogen *Batrachochytrium dendrobatidis*. *Microbial Ecology*, 74, 217-  
680 226.
- 681 Pruesse, E., Quast, C., Knittel, K., Fuchs, B.M., Ludwig, W., Peplies, J. &  
682 Glockner, F.O. (2007) Silva: A comprehensive online resource for  
683 quality checked and aligned ribosomal rna sequence data compatible  
684 with arb. *Nucleic Acids Research*, 35, 7188-7196.



- 685 R Development Core Team (2017) *R: A language and environment for*  
686 *statistical computing*. R Foundation for Statistical Computing, Vienna,  
687 Austria.
- 688 Reed, K.D., Ruth, G.R., Meyer, J.A. & Shukla, S.K. (2000) *Chlamydia*  
689 *pneumoniae* infection in a breeding colony of african clawed frogs  
690 (*Xenopus tropicalis*). *Emerging Infectious Diseases*, 6, 196-199.
- 691 Roberts, D.W. (2016) Labdsv: Ordination and multivariate analysis for  
692 ecology. *R package version 1.8.0*
- 693 Sabino-Pinto, J., Bletz, M.C., Islam, M.M., Shimizu, N., Bhujju, S., Geffers, R.,  
694 . . . Vences, M. (2016) Composition of the cutaneous bacterial  
695 community in japanese amphibians: Effects of captivity, host species,  
696 and body region. *Microbial Ecology*, 72, 460-469.
- 697 Schloss, P.D., Gevers, D. & Westcott, S.L. (2011) Reducing the effects of pcr  
698 amplification and sequencing artifacts on 16s rna-based studies. *PLoS*  
699 *One*, 6, e27310.
- 700 Schloss, P.D., Westcott, S.L., Ryabin, T., Hall, J.R., Hartmann, M., Hollister,  
701 E.B., . . . Weber, C.F. (2009) Introducing mothur: Open-source,  
702 platform-independent, community-supported software for describing  
703 and comparing microbial communities. *Applied and Environmental*  
704 *Microbiology*, 75, 7537-7541.
- 705 Schmidt, B.R., Bozzuto, C., Lotters, S. & Steinfartz, S. (2017) Dynamics of  
706 host populations affected by the emerging fungal pathogen  
707 *Batrachochytrium salamandrivorans*. *Royal Society Open Science*, 4,  
708 160801.
- 709 Singmann, H., Bolker, B., Westfall, J. & Aust, F. (2017) Afex: Analysis of  
710 factorial experiments. *R package version 0.18.0*.
- 711 Stacy, A., Fleming, D., Lamont, R.J., Rumbaugh, K.P. & Whiteley, M. (2016)  
712 A commensal bacterium promotes virulence of an opportunistic  
713 pathogen via cross-respiration. *MBio*, 7, e00782-00716.
- 714 Taylor, S.K., Williams, E.S., Thorne, E.T., Mills, K.W., Withers, D.I. & Pier,  
715 A.C. (1999) Causes of mortality of the wyoming toad. *Journal of*  
716 *Wildlife Diseases*, 35, 49-57.
- 717 Therneau, T.M. (2015) A package for survival analysis in s. *R package*  
718 *version 2.38*.
- 719 Wang, Q., Garrity, G.M., Tiedje, J.M. & Cole, J.R. (2007) Naive bayesian  
720 classifier for rapid assignment of rna sequences into the new bacterial  
721 taxonomy. *Applied and Environmental Microbiology*, 73, 5261-5267.
- 722 Woodhams, D.C., LaBumbard, B.C., Barnhart, K.L., Becker, M.H., Bletz,  
723 M.C., Escobar, L.A., . . . Minbiole, K.P.C. (2017) Prodigiosin, violacein,  
724 and volatile organic compounds produced by widespread cutaneous  
725 bacteria of amphibians can inhibit two *Batrachochytrium* fungal  
726 pathogens. *Microbial Ecology*, 75, 1049-1062.
- 727 Yap, T.A., Koo, M.S., Ambrose, R.F., Wake, D.B. & Vredenburg, V.T. (2015)  
728 Averting a north american biodiversity crisis. *Science*, 349, 481-482.
- 729 Zaneveld, J.R., McMinds, R. & Thurber, R.V. (2017) Stress and stability:  
730 Applying the Anna Karenina principle to animal microbiomes. *Nature*  
731 *Microbiology*, 2, 17121.
- 732 Zhang, J.J., Kobert, K., Flouri, T. & Stamatakis, A. (2014) Pear: A fast and  
733 accurate illumina paired-end read merger. *Bioinformatics*, 30, 614-620.
- 734

735 **Acknowledgements**

736 We thank A. Martel and F. Pasmans for providing the pathogen isolate used  
737 in the infection experiment. We are also grateful to Froglife for assistance with  
738 permits and field surveys. We thank P. Ghosh for help with experimental  
739 procedures and T. Garner for advice on experimental design. Finally, we wish  
740 to thank the Tedersoo group at the University of Tartu and the National Heart  
741 and Lung Institute for assistance with mycobiome sequencing. This research  
742 was funded by the Leverhulme Trust grant RPG-2014-273.

743

744 **Author contributions**

745

746 K.A.B. and V.L.M. conducted field surveys and animal experiments. K.A.B.,  
747 V.L.M., K.H., X.A.H., and J.M.G.S. performed data processing and analysis.  
748 K.A.B., M.C.F., S.P., X.A.H., V.L.M. and J.M.G.S. wrote the manuscript.

749

750 **Competing interests**

751

752 The authors declare no competing financial interests.

753

754 **Ethic statement**

755

756 Animal work was conducted under UK Home Office Project Licence PPL  
757 70/8402 held by Matthew Fisher and was reviewed by the Imperial College  
758 London Animal Welfare Ethical Review Board for approval. The experiment  
759 was carried out in accordance with The Animals (Scientific Procedures) Act of

760 1986 Directive 2010/63/EU and followed all of the Codes of Practice which  
761 reinforce this law, including all elements of housing, care and euthanasia.

762 Animals were collected in the wild under Natural England Licence 2015-  
763 15771-SCI-SCI and following ethical review by the board of Froglife.

764

765

766

767

768

769

770

771

772

773

774

775

776

777

778

779

780

781

782

783

784

785 **Figures**

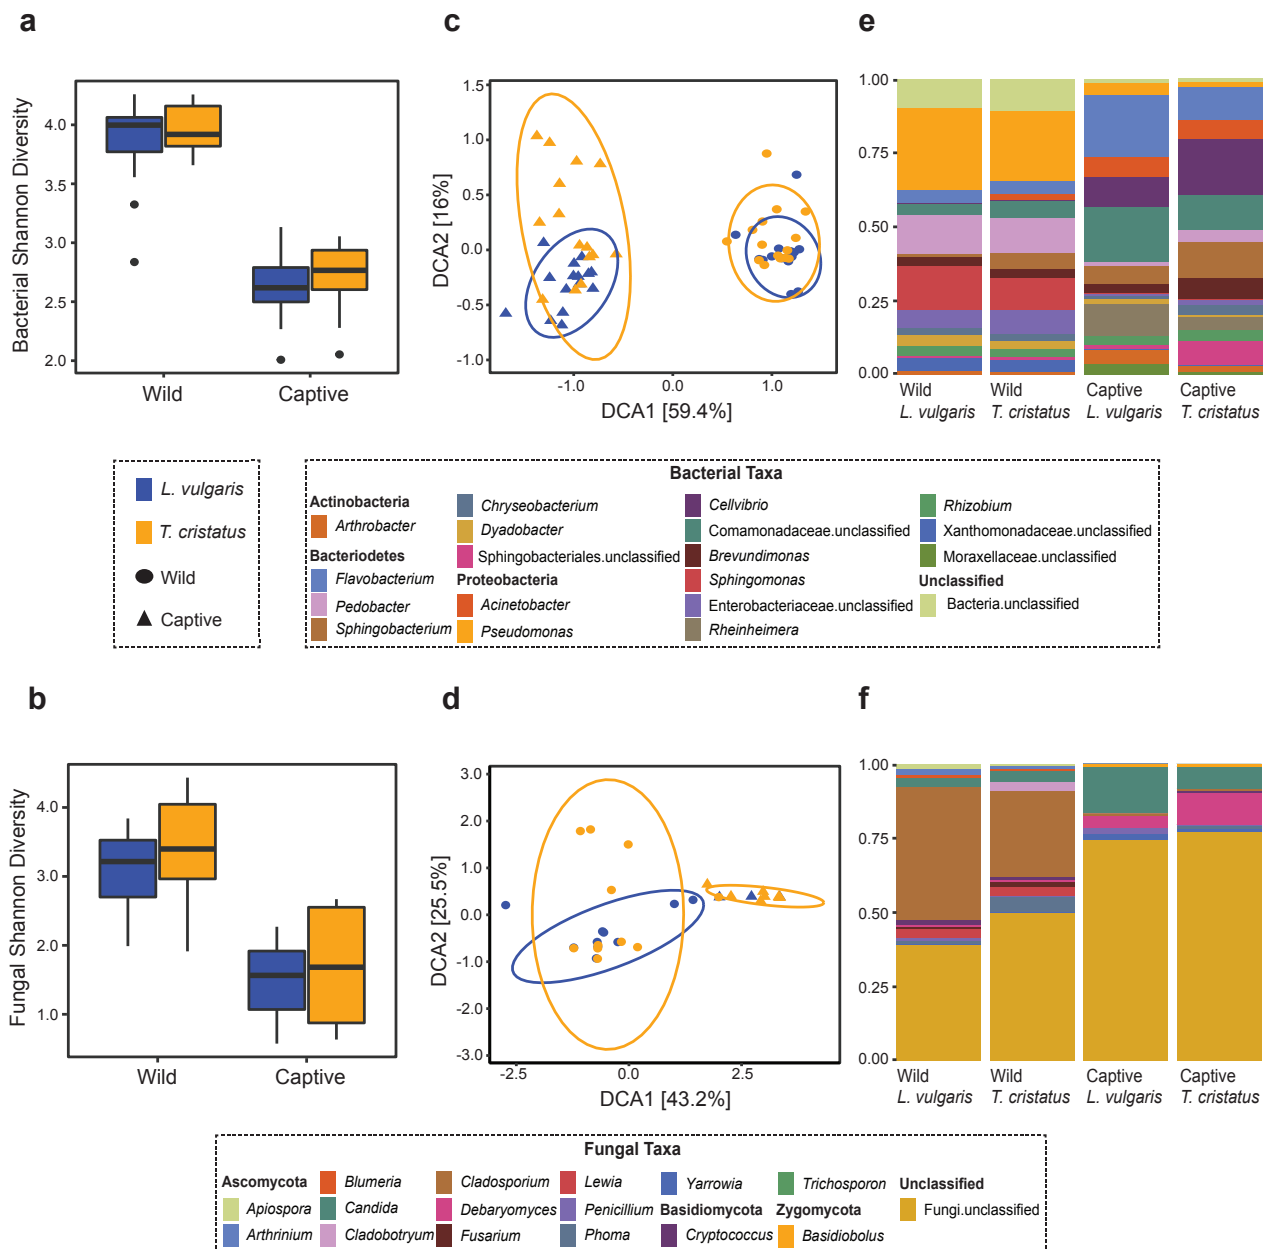

786

787 **Figure 1.** Boxplots displaying Shannon diversity in wild and captive *Lissotriton*  
 788 *vulgaris* and *Triturus cristatus* for **(a)** bacteria **(b)** fungi. Detrended  
 789 correspondence analysis (DCA) plots of beta diversity in wild and captive *L.*  
 790 *vulgaris* and *T. cristatus* for **(c)** bacteria **(d)** fungi. Ellipses indicate 95%  
 791 confidence intervals. Where ellipses are absent, insufficient samples were  
 792 present. Stacked bar plots of **(e)** bacterial taxa with relative abundance > 1%  
 793 and **(f)** fungal taxa with relative abundance > 0.5%.  
 794

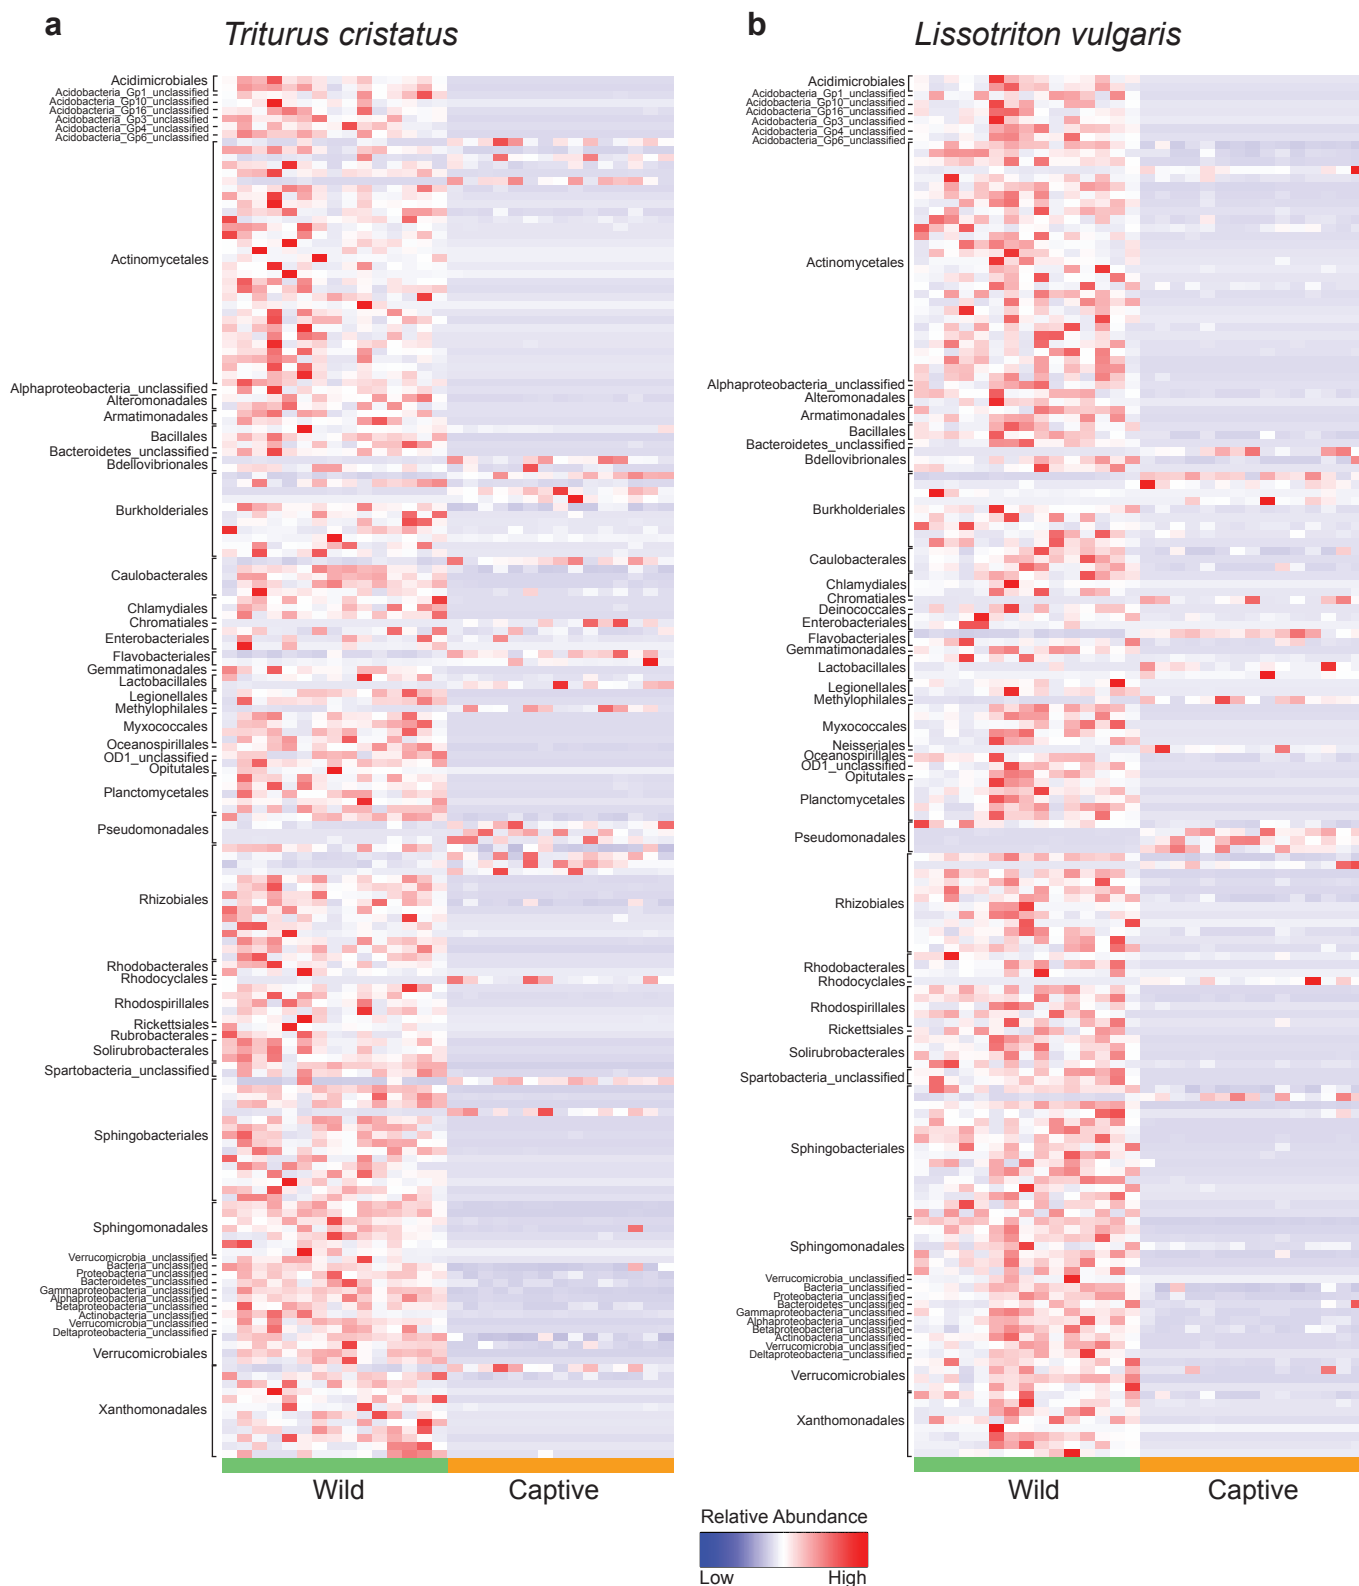

795 **Figure 2.** Heatmap of normalised relative abundance of bacterial indicator  
 796 OTUs for wild and captive animals labelled by order for **(a)** *T. cristatus* **(b)** *L.*  
 797 *vulgaris*.

a

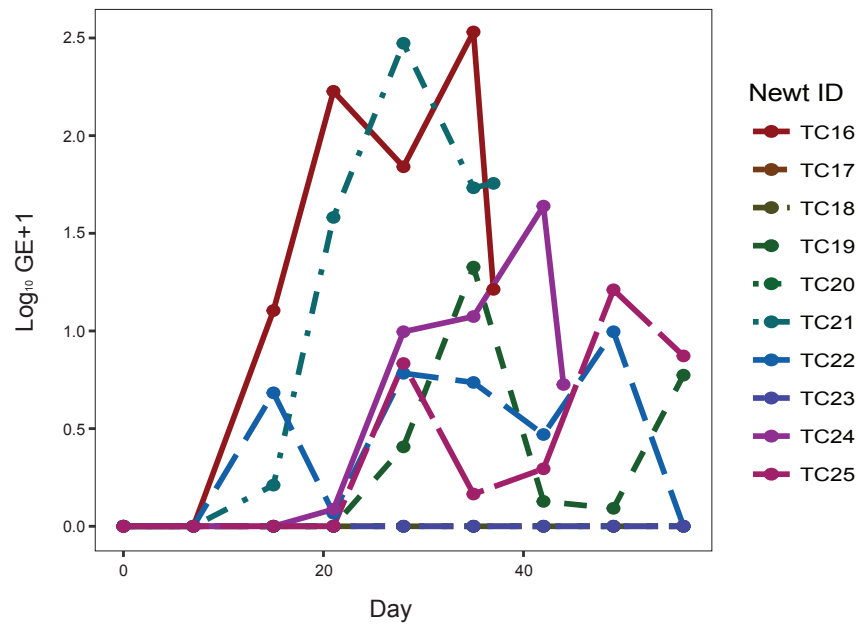

b

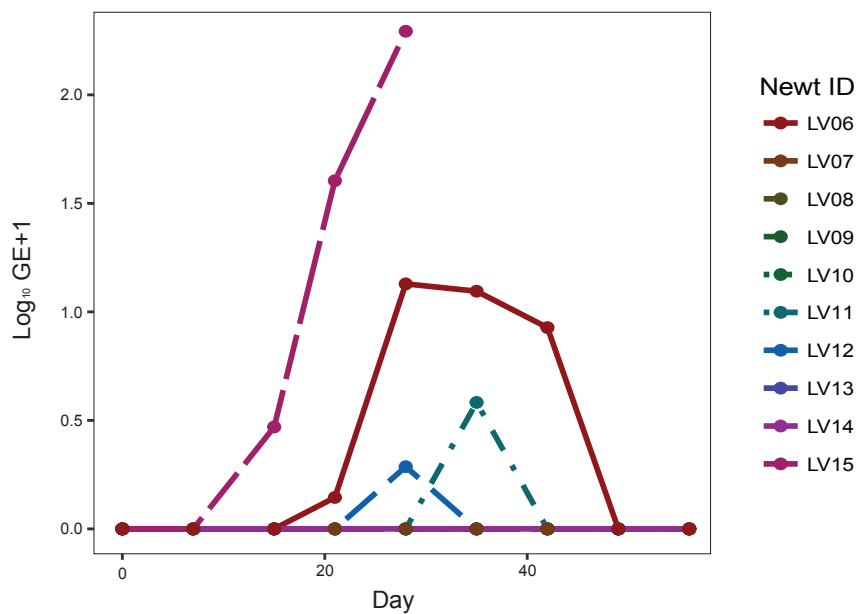

798

799 **Figure 3.** Plot of infection intensity for *Bsal* exposed animals for (a) *T.*

800 *cristatus* (b) *L. vulgaris*.

801

802

803

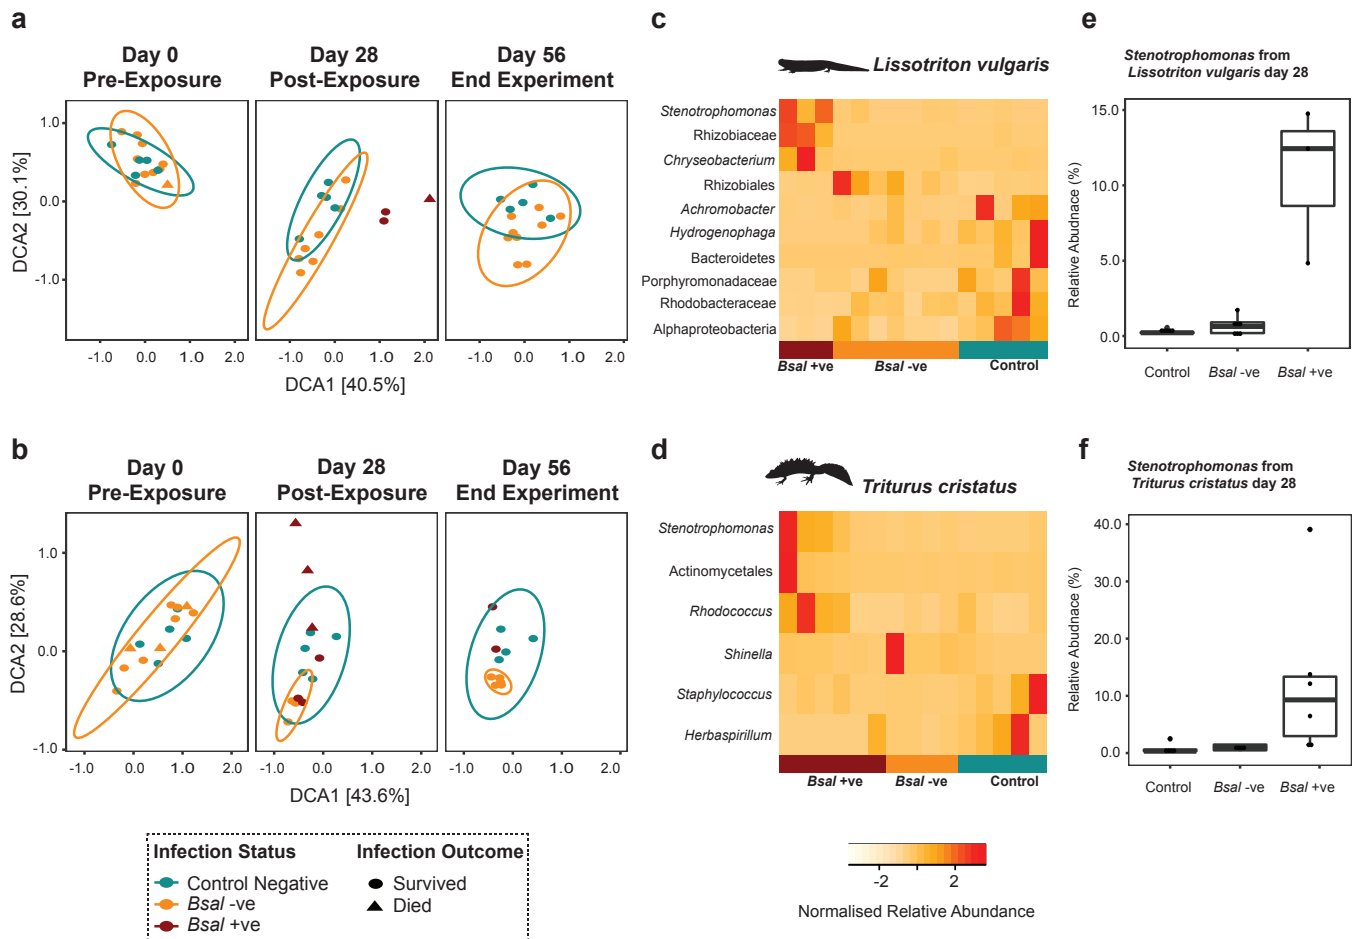

804

805 **Figure 4.** Detrended correspondence analysis (DCA) plots displaying  
 806 temporal variation in bacterial beta diversity in **(a)** *L. vulgaris* **(b)** *T. cristatus*.

807 Heatmap of normalised relative abundance of top bacterial indicator taxa

808 associated with different disease outcomes in **(c)** *L. vulgaris* **(d)** *T. cristatus*.

809 Boxplot of OTU016 *Stenotrophomonas* identified as an indicator OTU for *Bsal*

810 infection in both **(e)** *L. vulgaris* and **(f)** *T. cristatus*.
